# Supplementary material for: Diminished Macrophage Apoptosis and Reactive Oxygen Species Generation after Phorbol Ester Stimulation in Crohn's Disease
Source: PubMed Central journal article supplement (PMC2771353; doi:10.1371/journal.pone.0007787), 2009-11-12
Supplement: pone.0007787.s001.pdf [file pone.0007787.s001.pdf]

| Gender | Age | Ethnicity      | Disease Location      | Rx                        | Smoker |
|--------|-----|----------------|-----------------------|---------------------------|--------|
| M      | 35  | Caucasian      | TI                    | 5-ASA                     | N      |
| F      | 34  | Caucasian      | colonic               | 5-ASA                     | N      |
| F      | 23  | Caucasian      | colonic               | 5-ASA                     | N      |
| F      | 29  | Caucasian      | ileocolonic           | none                      | *      |
| M      | 26  | Caucasian      | ileocolonic           | none                      | N      |
| F      | 70  | Afro-caribbean | ileocolonic           | 5-ASA                     | N      |
| F      | 23  | Caucasian      | colonic, perianal     | none                      | N      |
| F      | 77  | Caucasian      | ileocolonic           | 5-ASA                     | N      |
| M      | 28  | Caucasian      | ileocolonic, fistula  | 6-mercaptopurine          | *      |
| M      | 62  | Caucasian      | ileocolonic           | none                      | *      |
| M      | 32  | Caucasian      | TI                    | 5-ASA                     | *      |
| M      | 73  | Caucasian      | ileocolonic           | Aspirin                   | *      |
| M      | 29  | Caucasian      | colonic               | 5-ASA, AZA                | N      |
| F      | 37  | Caucasian      | colonic               | 5-ASA                     | *      |
| M      | 38  | Caucasian      | ileocolonic           | *                         | *      |
| M      | 59  | Caucasian      | ileocolonic           | 5-ASA                     | *      |
| M      | 26  | Caucasian      | ileocolonic           |                           | *      |
| M      | 59  | Caucasian      | ileocolonic           | none                      | N      |
| F      | *   | Caucasian      | ileocolonic           | none                      | *      |
| F      | 25  | Caucasian      | colonic               | 5-ASA                     | *      |
| F      | 31  | Caucasian      | TI                    | *                         | *      |
| M      | 37  | Caucasian      | TI                    | 5-ASA                     | *      |
| M      | 34  | Caucasian      | colonic               | 5-ASA, MTX, Ciprofloxacin | *      |
| M      | 25  | Caucasian      | TI                    | 5-ASA                     | *      |
| F      | 24  | Caucasian      | ileocolonic           | none                      | N      |
| F      | 28  | Afro-caribbean | colonic               | 5-ASA                     | N      |
| M      | 28  | Caucasian      | TI                    | none                      | N      |
| F      | 21  | Caucasian      | colonic               | 5-ASA                     | *      |
| F      | 40  | Caucasian      | ileocolonic           | 5-ASA                     | *      |
| F      | 44  | Caucasian      | TI                    | 5-ASA                     | Y      |
| F      | 28  | Caucasian      | colonic               | 5-ASA                     | *      |
| F      | 47  | Caucasian      | colonic               | 5-ASA                     | N      |
| M      | 46  | Caucasian      | TI                    | 5-ASA                     | *      |
| M      | 27  | Caucasian      | TI, perianal          | none                      | *      |
| M      | 65  | Caucasian      | TI                    | none                      | Y      |
| M      | 39  | Caucasian      | colonic               | 5-ASA                     | *      |
| M      | 35  | Caucasian      | ileocolonic           | 5-ASA                     | *      |
| F      | 38  | Caucasian      | TI                    | 5-ASA                     | *      |
| F      | 37  | Caucasian      | ileocolonic           | none                      | *      |
| M      | 36  | Caucasian      | colonic               | none                      | N      |
| M      | 42  | Asian          | colonic               | 5-ASA                     | N      |
| F      | 61  | Caucasian      | colonic               | 5-ASA                     | *      |
| M      | *   | Caucasian      | *                     | none                      | *      |
| M      | 37  | Caucasian      | colonic               | 5-ASA                     | *      |
| F      | 27  | Caucasian      | ileocolonic           | 5-ASA                     | *      |
| F      | 28  | Asian          | TI                    | none                      | *      |
| M      | 47  | Caucasian      | TI                    | none                      | *      |
| M      | 52  | Caucasian      | TI                    | 5-ASA                     | *      |
| M      | 43  | Caucasian      | colonic               | 5-ASA                     | *      |
| F      | 33  | Caucasian      | ileocolonic, perianal | 5-ASA                     | *      |
| M      | 36  | Caucasian      | colonic, perianal     | 5-ASA                     | *      |
| F      | 48  | Caucasian      | TI                    | 5-ASA                     | *      |
| M      | 57  | Caucasian      | ileocolonic           | none                      | N      |
| F      | 41  | Asian          | ileocolonic, perianal | 5-ASA                     | *      |
| M      | 45  | Asian          | ileocolonic           | 5-ASA                     | *      |
| M      | *   | Caucasian      | ileocolonic           | 5-ASA                     | *      |
| M      | 20  | Caucasian      | colonic               | 5-ASA                     | N      |
| F      | 46  | Caucasian      | colonic               | 5-ASA                     | N      |
| M      | 56  | Caucasian      | ileocolonic           | 5-ASA                     | *      |
| F      | 34  | Asian          | colonic               | 5-ASA                     | N      |
| F      | *   | Caucasian      | colonic               | Infliximab                | *      |
| M      | 34  | Asian          | ileocolonic           | 5-ASA                     | *      |
| F      | 26  | Caucasian      | colonic               | 5-ASA, Steroids           | *      |
| F      | 30  | Caucasian      | TI                    | 5-ASA                     | *      |
| F      | 33  | Caucasian      | TI                    | 5-ASA                     | *      |
| M      | 56  | Caucasian      | ileocolonic           | 5-ASA                     | *      |
| M      | *   | Caucasian      | TI                    | none                      | *      |
| M      | 29  | Caucasian      | colonic               | 5-ASA                     | *      |
| M      | 23  | Caucasian      | TI                    | none                      | N      |
| F      | 40  | Caucasian      | ileocolonic           | 5-ASA                     | *      |
| F      | *   | Caucasian      | ileocolonic           | none                      | *      |
| M      | *   | Caucasian      | *                     | *                         | *      |
| F      | 65  | Caucasian      | TI                    | 5-ASA                     | *      |
| M      | 40  | Caucasian      | TI, perianal          | none                      | *      |
| F      | 68  | Caucasian      | ileocolonic           | none                      | *      |
| F      | 51  | Caucasian      | ileocolonic, perianal | 5-ASA                     | Y      |
| F      | 60  | Caucasian      | TI                    | none                      | *      |
| F      | 36  | Caucasian      | ileocolonic           | none                      | *      |
| M      | 43  | Caucasian      | colonic               | 5-ASA, Steroid            | *      |
| F      | 23  | Caucasian      | ileocolonic           | 5-ASA                     | *      |
| M      | 48  | Caucasian      | ileocolonic           | 5-ASA, Sildenafil         | *      |
| F      | 38  | Caucasian      | ileocolonic, fistula  | none                      | *      |
| F      | 53  | Caucasian      | colonic               | none                      | N      |

\* data not available

Supplementary Table 1
